# Supplementary material for: Predicting COVID-19 Severity with a Specific Nucleocapsid Antibody plus Disease Risk Factor Score
Source: PubMed Central journal article supplement (PMC8092137; doi:10.1128/msphere.00203-21), 2021-04-28

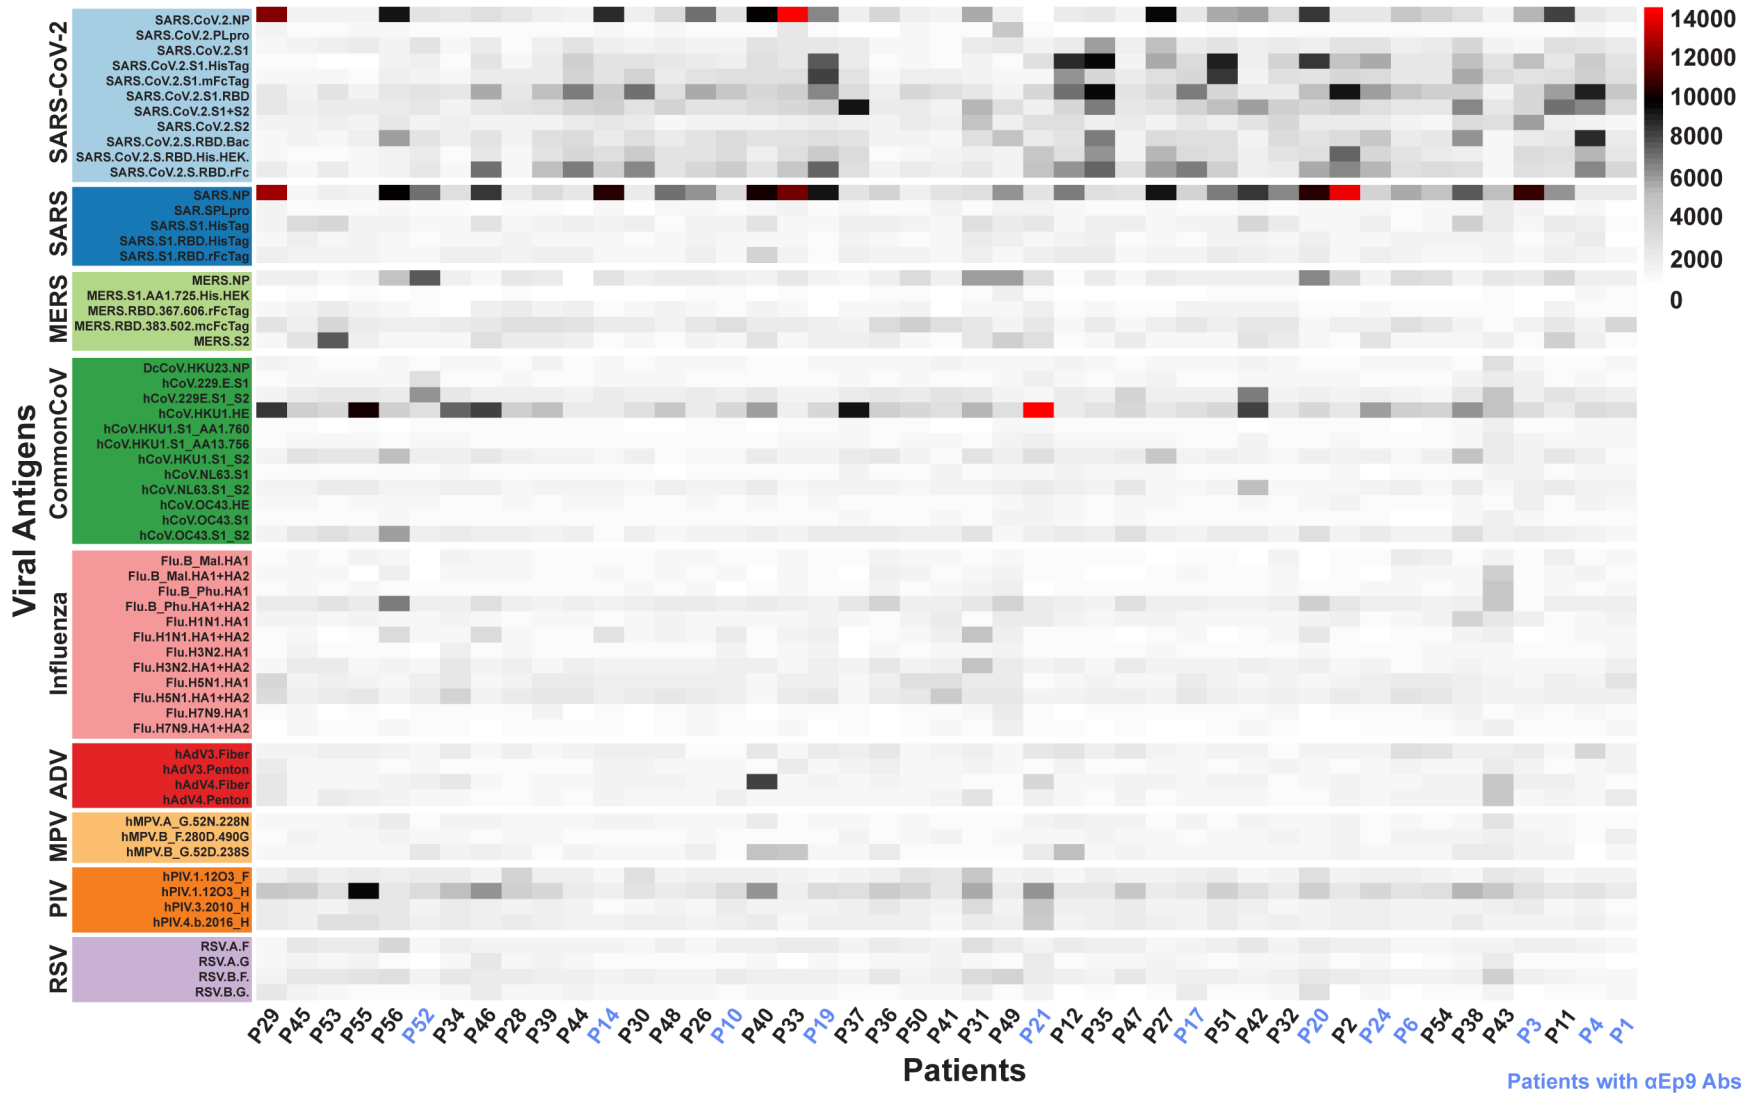

Supplement: mSphere.00203-21-sf004.pdf [file mSphere.00203-21-sf004.pdf]
