# Supplementary material for: Predicting COVID-19 Severity with a Specific Nucleocapsid Antibody plus Disease Risk Factor Score
Source: PubMed Central journal article supplement (PMC8092137; doi:10.1128/msphere.00203-21), 2021-04-28
Supplement: mSphere.00203-21-st001.pdf [file mSphere.00203-21-st001.pdf]

| Epitope | Virus      | Protein | Residues* | Amino Acid Sequence                                                                                                                                                                                                                     | Sequence Length | Rationale for selection                                                                                                                              | Ref. for rationale |
|---------|------------|---------|-----------|-----------------------------------------------------------------------------------------------------------------------------------------------------------------------------------------------------------------------------------------|-----------------|------------------------------------------------------------------------------------------------------------------------------------------------------|--------------------|
| Ep1     | SARS-CoV-2 | S       | 287-317   | DAVDCALDPLSETKCTLKSFTVEKGIYQTSN                                                                                                                                                                                                         | 31              | Predicted B-cell epitope in SARS-Cov-2 identified by bioinformatics to have immunodominant region                                                    | (13)               |
| Ep2     | SARS-CoV-2 | S       | 802-819   | FSQILPDPSKPSKRSFIE                                                                                                                                                                                                                      | 18              | Predicted B-cell epitope in SARS-Cov-2 identified by bioinformatics to have immunodominant region                                                    | (13)               |
| Ep3     | SARS-CoV-2 | S       | 15-30     | CVNLTTRTQLPPAYTN                                                                                                                                                                                                                        | 16              | Predicted B-cell epitope in SARS-CoV-2 identified by immunoinformatics                                                                               | (14)               |
| Ep4     | SARS-CoV-2 | S       | 1056-1070 | APHGVVFLHVTVVPA                                                                                                                                                                                                                         | 15              | Predicted B-cell epitope in SARS-CoV-2 identified by structural biology and machine learning, SARS homolog of this peptide is a known B-cell epitope | (12)               |
| Ep5     | SARS-CoV-2 | M       | 1-24      | MADSNGTITVEELKLLLEQWNLVI                                                                                                                                                                                                                | 24              | Predicted B-cell epitope in SARS-Cov-2 identified by bioinformatics to have immunodominant region                                                    | (13)               |
| Ep6     | SARS-CoV-2 | M       | 132-151   | PLLESELVIGAVILRGHLRI                                                                                                                                                                                                                    | 20              | Predicted B-cell epitope in SARS-Cov-2 identified by bioinformatics to have immunodominant region                                                    | (13)               |
| Ep7     | SARS-CoV-2 | M       | 97-111    | IASFRLFARTRSMWS                                                                                                                                                                                                                         | 15              | Predicted B-cell epitope in SARS-CoV-2 identified by structural biology and machine learning, SARS homolog of this peptide is a known B-cell epitope | (12)               |
| Ep8     | SARS-CoV-2 | N       | 41-61     | RPQGLPNNTASWFTALTQHGK                                                                                                                                                                                                                   | 21              | Predicted B-cell epitope in SARS-Cov-2 identified by bioinformatics to have immunodominant region n                                                  | (13)               |
| Ep9     | SARS-CoV-2 | N       | 152-172   | ANNAIVLQLPQGTTLPKGFY                                                                                                                                                                                                                    | 21              | Predicted B-cell epitope in SARS-Cov-2 identified by bioinformatics to have immunodominant region                                                    | (13)               |
| Ep10    | SARS-CoV-2 | N       | 264-278   | ATKAYNVTQAFGRRG                                                                                                                                                                                                                         | 15              | Predicted B-cell epitope in SARS-CoV-2 identified by structural biology and machine learning, SARS homolog of this peptide is a known B-cell epitope | (12)               |
| Ep11    | SARS-CoV-2 | E       | 52-66     | VKPSFYVYSRVKNLN                                                                                                                                                                                                                         | 15              | Predicted B-cell epitope in SARS-CoV-2 identified by structural biology and machine learning, SARS homolog of this peptide is a known B-cell epitope | (12)               |
| Ep12    | SARS-CoV-2 | S       | 524-598   | VCGPKKSTNLVKNKCVNFNFNGLTGTGVLTESNKKFLPFQ<br>QFGRDIADTTDAVRDPQLEILDITPCSFGGVSVI                                                                                                                                                          | 75              | Predicted B-cell epitope in SARS-Cov-2 identified by bioinformatics to have immunodominant region                                                    | (13)               |
| Ep13    | SARS-CoV-2 | S       | 601-640   | GTNTSNQVAVLYQDVNCTEVPVAIHADQLTPTWRVYSTGS                                                                                                                                                                                                | 40              | Predicted B-cell epitope in SARS-Cov-2 identified by bioinformatics to have immunodominant region. Based on the D614G variant.                       | (13)               |
| Ep13*   | SARS-CoV-2 | S       | 601-640   | GTNTSNQVAVLYQGVNCTEVPVAIHADQLTPTWRVYSTGS                                                                                                                                                                                                | 40              | Sequence has the mutation D614G, which increases the fitness of SARS-CoV-2                                                                           | (26,27,54)         |
| Ep14    | SARS-CoV-2 | S       | 61-76     | NVTWFHAIHVSGTNGT                                                                                                                                                                                                                        | 16              | Predicted B-cell epitope in SARS-CoV-2 identified by immunoinformatics                                                                               | (14)               |
| Ep15    | SARS-CoV-2 | S       | 373-390   | SFSTFKCYGVSPTKLNDL                                                                                                                                                                                                                      | 18              | Predicted B-cell epitope in SARS-CoV-2 identified by immunoinformatics                                                                               | (14)               |
| Ep16    | SARS-CoV-2 | N       | 354-400   | NKHIDAYKTFPPTPEPKDKKKKADETQALPQRQKKQQTVT<br>LLPAADL                                                                                                                                                                                     | 47              | Predicted B-cell epitope in SARS-Cov-2 identified by bioinformatics to have immunodominant region                                                    | (13)               |
| Ep17    | SARS-CoV-2 | S       | 319-529   | RVQPTESIVRFPNITNLCPFGEVFNATRFASVYAWNRKRI<br>SNCVADYSVLYNSASFSTFKCYGVSPTKLNDLCFTNVYAD<br>SFVIRGDEVQRQIAPGQTGKIADYNYKLPDDFTGCVIAWNS<br>NNLDSKVGGNLYLYRLFRKSNLKPFFERDISTEIQAGST<br>PCNGVEGFNCYFPLQSYGFQPTNGVGYQPYRVVVLSFELL<br>HAPATVCGPKK | 211             | Based on structure of S protein X-ray structure (PBD: 6VXX)                                                                                          | (24)               |
| Ep18    | SARS-CoV-2 | S       | 488-507   | CYFPLQSYGFQPTNGVGYQP                                                                                                                                                                                                                    | 20              | Based on X-ray structure of S protein (PBD: 6VXX)                                                                                                    | (24)               |
| Ep19    | SARS-CoV-2 | S       | 429-448   | FTGCVIAWNSNNLDSKVGGN                                                                                                                                                                                                                    | 20              | Based on X-ray structure of S protein (PBD: 6VXX)                                                                                                    | (24)               |
| Ep20    | SARS-CoV-2 | S       | 448-466   | NYNLYRLFRKSNLKPFFER                                                                                                                                                                                                                     | 19              | Based on X-ray structure of S protein (PBD: 6VXX)                                                                                                    | (24)               |
| Ep21    | SARS-CoV-2 | S       | 467-487   | DISTEIQAGSTPCNGVEGFN                                                                                                                                                                                                                    | 21              | Based on X-ray structure of S protein (PBD: 6VXX)                                                                                                    | (24)               |
| sEp9    | SARS       | N       | 153-173   | NNNAATVLQLPQGTTLPKGFY                                                                                                                                                                                                                   | 21              | SARS homolog of Ep9                                                                                                                                  |                    |
| mEp9    | MERS       | N       | 141-161   | NNSAIVTQFAPGTKLPKNFH                                                                                                                                                                                                                    | 21              | MERS homolog of Ep9                                                                                                                                  |                    |
| hEp9    | HKU-1      | N       | 166-186   | TTQEAIPTRFPPGTILPQGY                                                                                                                                                                                                                    | 21              | HKU-1 homolog of Ep9                                                                                                                                 |                    |
| nEp9    | NL63       | N       | 119-136   | NQKPLEPKFSIALPPELS                                                                                                                                                                                                                      | 18              | NL63 homolog of Ep9                                                                                                                                  |                    |

\*Residue numbering from protein sequences deposited in GenBank. Specifically, the accession numbers were as follows: S protein (YP\_009724390.1), M protein (YP\_009724393.1), N protein (YP\_009724397.2) and E protein (YP\_009724392.1) from SARS-CoV-2 and N protein from SARS (NP\_828855.1), MERS (YP\_009047211.1), HKU-1 (YP\_173242.1), or NL63 (YP\_003771.1).
