# Supplementary material for: Predicting COVID-19 Severity with a Specific Nucleocapsid Antibody plus Disease Risk Factor Score
Source: PubMed Central journal article supplement (PMC8092137; doi:10.1128/msphere.00203-21), 2021-04-28
Supplement: mSphere.00203-21-st002.pdf [file mSphere.00203-21-st002.pdf]

| Characteristics                                             | No $\alpha$ Ep9 Abs (n=63)      | $\alpha$ Ep9 Abs (n=23)      | p-value  |
|-------------------------------------------------------------|---------------------------------|------------------------------|----------|
| <b>Demographics</b>                                         |                                 |                              |          |
| Age ( $\pm$ SD)                                             | 49.75 ( $\pm$ 18.45)            | 47.26 ( $\pm$ 18.45)         | 0.5668   |
| Gender F: M (%)                                             | 21:42 (44.4/66.7)               | 10:13 (43.5/56.5)            | 0.4502   |
| Ethnicity n, (%)                                            | 15 (65.2): 4 (17.4):            | 39 (61.9): 8 (12.7):         | 0.7760   |
| (Hispanic: Asian: Caucasian: Black: Other)                  | 3 (13.0): 1 (4.3): 0 (0)        | 9 (14.3) :3 (4.8) :4 (6.3)   |          |
| BMI ( $\pm$ SD)                                             | 28.89 ( $\pm$ 6.445)            | 32.06 ( $\pm$ 7.896)         | 0.0642   |
| <b>Preconditions, n (%)</b>                                 |                                 |                              |          |
| Hypertension                                                | 23 (36.5)                       | 10 (43.5)                    | 0.6203   |
| Diabetes                                                    | 21 (33.3)                       | 6 (26.1)                     | 0.6065   |
| CVD                                                         | 6 (9.5)                         | 2 (8.7)                      | 1.0000   |
| CAD                                                         | 6 (9.5)                         | 2 (8.7)                      | 1.0000   |
| CKD/ESRD                                                    | 6 (9.5)                         | 2 (8.7)                      | 1.0000   |
| Asthma/COPD                                                 | 8 (12.7)                        | 3 (13.0)                     | 1.0000   |
| Obesity                                                     | 24 (38.1)                       | 13 (56.5)                    | 0.1461   |
| Cancer                                                      | 2 (3.17)                        | 3 (13.0)                     | 0.1163   |
| <b>Symptoms, n (%)</b>                                      |                                 |                              |          |
| Total Days of Symptoms                                      | 9.8 ( $\pm$ 8.98)               | 17 ( $\pm$ 10.13)            | 0.0059** |
| Cough                                                       | 43 (68.3)                       | 15 (65.2)                    | 0.7997   |
| Dyspnea/SOB                                                 | 28 (44.4)                       | 11 (47.8)                    | 0.8108   |
| Myalgia/Fatigue                                             | 17 (27.0)                       | 8 (34.8)                     | 0.5926   |
| Headache                                                    | 12 (19.0)                       | 2 (8.7)                      | 0.3349   |
| Chest pain                                                  | 7 (11.1)                        | 3 (13.0)                     | 1.0000   |
| Anosmia                                                     | 4 (6.3)                         | 2 (8.7)                      | 0.6561   |
| Stroke-like Symptoms                                        | 0                               | 2 (8.7)                      | 0.0692   |
| Abdominal pain                                              | 3 (4.8)                         | 0                            | 0.5611   |
| Pulmonary symptoms <sup>^</sup><br>(Pneumonia: Other: None) | 16 (25.4): 36 (52.38): 8 (12.7) | 13 (56.5): 7 (30.4): 1 (4.3) | 0.0142*  |
| <b>Severity, n (%)</b>                                      |                                 |                              |          |
| Asymptomatic                                                | 3                               | 0                            | 0.5611   |
| Non-severe: Severe <sup>^^</sup>                            | 51:12 (n, severity 19.0%)       | 10:13 (n, severity 56.5%)    | 0.0013** |
| Days in Hospital                                            | 5.79 ( $\pm$ 8.01)              | 10.95 ( $\pm$ 10.74)         | 0.0183*  |
| Days in ICU                                                 | 12.63 ( $\pm$ 13.19) n=11       | 12.50 ( $\pm$ 6.93), n=12    | 0.8004   |
| Days on ventilator                                          | 14.00( $\pm$ 3.96), n=6         | 12.86 ( $\pm$ 5.40), n=7     | 0.7934   |

Results are presented as mean  $\pm$  standard deviation (SD) or patient number (n) and percentage of population (%). P-values for continuous variables are calculated using unpaired, two-tailed T-tests. P-values for categorical variables use Fisher's exact test for single value parameters, and Chi-squared test for multi-group variables. \*, \*\* p-values < 0.05, 0.01, respectively.

<sup>^</sup> Pulmonary symptoms are based descriptive reports of X-ray and CT scans. "Other" pulmonary symptoms include, but are not limited to, atelectasis, pleural scarring, pleural effusion, pulmonary edema, mild peribronchial thickening.

<sup>^^</sup> non-severe include ER and In-patients only, severe includes patients in the ICU, on the ventilator or death.

BMI = body mass index, CVD = cardiovascular disease, CAD = coronary artery disease, CKD = chronic kidney disease, ESRD = end-stage renal disease, SOB = shortness of breath, COPD = chronic obstructive pulmonary disease
